# Supplementary material for: Activating Transcription Factor 6 (ATF6) Sequence Polymorphisms in Type 2 Diabetes and Pre-Diabetic Traits
Source: Oxford University Press journal article supplement (doi:10.2337/db06-1305), 2007-02-27
Supplement: pg856onlineappendixtables.doc [file pg856onlineappendixtables.doc]

**Online Supplemental Data: Tables and Figures**

**Table 3S: List of all *ATF6* region variants evaluated in Utah Caucasians**

| **rs No** | **Location** | **Allele** | **Position** | **Amino acid** | **Gene**  **Location** | **Typing Method** |
| --- | --- | --- | --- | --- | --- | --- |
| rs12745240 | -8150 | G/A | 158459659 |  | 5'flanking | PSQ |
| rs1417580 | -6402 | C/A | 158461407 |  | 5'flanking | PSQ |
| rs1417581 | -6250 | G/C | 158461559 |  | 5'flanking | PSQ |
| rs2298019 | -116 | G/A | 158467693 |  | 5'flanking | OLA |
| rs2271010 | 323 | T/C | 158468131 |  | Intron1 | Illumina (Consortium) |
| rs4657101 | 2088 | A/C | 158469896 |  | Intron 1 | PSQ |
| rs7553368 | 4160 | T/C | 158471968 |  | Intron1 | PSQ (95 LD samples only) |
| rs905594 | 5124 | C/T | 158472932 |  | Intron 1 | PSQ and Illumina (duplicate typing) |
| rs2340823 | 10528 | T/C | 158478336 |  | Intron 1 | PSQ |
| rs2340824 | 10622 | T/C | 158478430 |  | Intron1 | Illumina (Consortium) |
| rs2070151 | 11906 | C/T | 158479714 | L 35 L | Exon 2 | PSQ and Illumina (duplicate typing) |
| rs1058405 | 15591 | A/G | 158483399 | M 67 V | Exon 3 | PSQ |
| rs2271013 | 17652 | T/C | 158485460 | P 90 P | Exon 4 | Illumina + extra samples by PSQ |
| rs2271012 | 17691 | G/A | 158485499 | S 103 S | Exon 4 | PSQ (95 LD samples only) |
| rs1910480 | 17767 | G/C | 158485575 |  | Intron 4 | PSQ (95 LD samples only) |
| rs1503807 | 17854 | T/A | 158485662 |  | Intron 4 | PSQ (95 LD samples only) |
| rs1027700 | 20886 | A/T | 158488694 |  | Intron4 | Illumina and PSQ (Duplicate Typing) |
| rs6427630 | 21477 | A/G | 158489285 |  | Intron 4 | Illumina and PSQ (duplicate typing) |
| rs2070150 | 25126 | C/G | 158492934 | P 145 A | Exon 5 | PSQ and Illumina (duplicate typing) |
| rs1135983 | 25162 | C/T | 158492970 | S 157 P | Exon 5 | PSQ |
| rs10917946 | 26474 | G/A | 158494282 |  | Intron 6 | PSQ (95 LD samples only) |
| rs2134690 | 27783 | G/A | 158495591 |  | Intron 6 | All Sample by PSQ |
| rs10917955 | 29845 | T/C | 158497653 |  | Intron 6 | Illumina (Consortium) |
| rs2879841 | 30671 | G/A | 158498479 |  | Intron 6 | PSQ (95 LD samples only) |
| rs2036495 | 33205 | C/G | 158501013 |  | Intron 6 | PSQ (95 LD samples only) |
| rs1553443 | 35366 | A/G | 158503174 |  | Intron 6 | PSQ (95 LD samples only) |
| rs3738326 | 36092 | G/A | 158503900 |  | Intron 7 | Illumina (Consortium) |
| rs11576878 | 39427 | A/G | 158507235 |  | Intron 7 | Illumina (Consortium) |
| rs4656334 | 42544 | G/A | 158510352 |  | Intron 7 | Illumina (Consortium) |
| rs2134697 | 44829 | A/G | 158512637 |  | Intron 7 | PSQ |
| rs2134696 | 45050 | T/A | 158512858 |  | Intron 7 | PSQ |
| rs4657109 | 48255 | G/A | 158516063 |  | Intron 7 | Illumina (Consortium) |
| rs3817085 | 53475 | G/C | 158521283 |  | Intron 8 | Illumina + extra samples by PSQ |
| rs12403862 | 61198 | A/G | 158529006 |  | Intron 9 | Illumina (Consortium) |
| rs4657110 | 62089 | C/T | 158529897 |  | Intron 9 | Illumina (Consortium) |
| rs2340715 | 69738 | G/T | 158537546 |  | Intron 9 | Illumina + extra samples by PSQ |
| rs1006310 | 75405 | C/T | 158543213 |  | Intron 9 | Illumina (Consortium) |
| rs1553444 | 77365 | T/C | 158545173 |  | Intron 9 | Illumina (Consortium) |
| rs3767635 | 84754 | A/G | 158552562 |  | intron10 | Illumina +extra samples by PSQ |
| rs3817084 | 85085 | T/C | 158552893 |  | Intron 10 | PSQ (95 LD samples only) |
| rs2340718 | 87047 | T/G | 158554855 |  | Intron 12 | PSQ (95 LD samples only) |
| rs3767633 | 90465 | A/T | 158558273 |  | Intron 12 | Illumina +extra samples by PSQ |
| rs1394066 | 94778 | A/G | 158562586 |  | Intron 13 | Illumina (Consortium) |
| rs3767632 | 97083 | G/A | 158564891 |  | intron14 | PSQ |
| rs10918092 | 98430 | T/A | 158566238 |  | Intron 14 | PSQ (95 LD samples only) |
| rs6427632 | 98631 | C/T | 158566439 |  | Intron 14 | Illumina (Consortium) |
| rs1503815 | 101978 | C/T | 158569786 |  | Intron 14 | Illumina + extra samples by PSQ |
| rs12024729 | 111220 | T/A | 158579028 |  | Intron 14 | Illumina (Consortium) |
| rs957862 | 113030 | G/A | 158580838 |  | Intron 14 | PSQ (95 LD samples only) |
| rs2340721 | 113235 | C/A | 158581043 |  | Intron 14 | Illumina (Consortium); 95 LD samples by PSQ |
| rs2340722 | 120274 | A/G | 158588082 |  | Intron 14 | Illumina (Consortioum); 95 LD sampes by PSQ |
| rs4147177 | 121930 | C/T | 158589738 |  | Intron 14 | PSQ |
| rs1806594 | 122710 | C/T | 158590518 |  | Intron 14 | Illumina (Consortium) |
| rs6427635 | 127773 | T/C | 158595581 |  | Intron 14 | Illumina (Consortium) |
| rs12033967 | 135657 | G/A | 158603465 |  | Intron 14 | Illumina (Consortium) |
| rs2341473 | 136621 | G/A | 158604429 |  | Intron 14 | Illumina + extra samples by PSQ |
| rs12079579 | 144332 | G/A | 158612140 |  | Intron 14 | Illumina + extra samples by PSQ |
| rs2341479 | 149202 | A/C | 158617010 |  | Intron 15 | Illumina + extra samples by PSQ |
| rs4417044 | 152805 | C/T | 158620613 |  | Intron 15 | Illumina + extra samples by PSQ |
| rs2341480 | 159788 | T/G | 158627596 |  | Intron 15 | Illumina (Consortium) |
| rs10918215 | 163581 | A/G | 158631389 |  | Intron 15 | Illumina (Consortium) |
| rs7514053 | 166885 | G/A | 158634693 |  | Intron 15 | Illumina (Consortium) |
| rs2341481 | 168348 | A/G | 158636156 |  | Intron 15 | PSQ |
| rs10737517 | 172188 | A/G | 158639996 |  | Intron 15 | Illumina (Consortium) |
| rs10800151 | 178133 | A/G | 158645941 |  | Intron 15 | Illumina + extra samples by PSQ |
| rs10918279 | 181842 | C/A | 158649650 |  | Intron 15 | Illumina + extra samples by PSQ |
| rs2341471 | 188599 | G/A | 158656407 |  | Intron 15 | Illumina (Consortium) |
| rs7522210 | 191029 | G/C | 158658837 |  | Intron 15 | PSQ (95 LD samples only) |
| rs9482 | 192177 | G/A | 158659985 | S to S | Exon 16 | PSQ (95 LD samples only) |
| rs13401 | 192418 | A/G | 158660226 |  | 3'UTR | PSQ |
| rs1136046 | 192621 | G/A | 158660429 |  | 3'UTR | PSQ |
| rs2499855 | 193611 | T/C | 158661419 |  | 3'flanking | PSQ |
| rs11579627 | 194804 | G/A | 158662612 |  | 3'flanking | PSQ |
| rs2499849 | 195478 | C/G | 158663286 |  | 3'flanking | Illumina & extra samples by PSQ |
| rs9783050 | 199870 | A/G | 158667678 |  | 3'flanking | PSQ |
| rs2490438 | 200638 | G/A | 158668446 |  | 3'flanking | Illumina + extra samples by PSQ |
| rs2490433 | 202745 | C/A | 158670553 |  | 3'flanking | PSQ |
| rs2490431 | 205069 | C/T | 158672877 |  | 3'flanking | Illumina/PSQ (duplicate typing) |

Table 3S lists all SNPs evaluated in this study, in and upstream of ATF6. Location is given relative to the A of the ATG start as 1 and the first base upstream as -1, based on NCBI Build 35 (UCSC May 2004). Alleles are shown as major/minor in Caucasians. Except as noted, the sample size was 191 cases and 188 controls, except for SNPs typed only in the Consortium sample, in which case only 165 controls were tested.

**Table 4S: Counts of cases and controls by genotype for *ATF6* region variants in Utah Caucasians**

| **Name** | **Allele** | **N**  **(Total)** | **Case** | | | **Control** | | | **Hardy Weinberg**  **P value** |
| --- | --- | --- | --- | --- | --- | --- | --- | --- | --- |
| **D/D** | **D/d** | **d/d** | **D/D** | **D/d** | **d/d** |
| rs12745240 | G/A | 372 | 57 | 96 | 34 | 73 | 90 | 22 | 0.53 |
| rs1417580 | C/A | 371 | 50 | 97 | 43 | 63 | 86 | 32 | 0.98 |
| rs1417581 | G/C | 377 | 51 | 97 | 42 | 64 | 89 | 34 | 0.99 |
| rs2298019 | G/A | 374 | 142 | 45 | 2 | 133 | 49 | 3 | 0.49 |
| rs2271010 | T/C | 353 | 146 | 34 | 0 | 141 | 32 | 0 | 0.06 |
| rs4657101 | A/C | 377 | 126 | 54 | 10 | 106 | 69 | 12 | 0.38 |
| rs905594 | C/T | 367 | 86 | 75 | 25 | 65 | 96 | 20 | 0.82 |
| rs2340823 | T/C | 376 | 173 | 16 | 0 | 160 | 27 | 0 | 0.53 |
| rs2340824 | T/C | 355 | 155 | 26 | 0 | 143 | 31 | 0 | 0.16 |
| rs2070151 | C/T | 374 | 173 | 16 | 0 | 159 | 26 | 0 | 0.56 |
| rs1058405 | A/G | 370 | 94 | 69 | 25 | 111 | 59 | 12 | **0.019** |
| rs2271013 | T/C | 372 | 163 | 26 | 0 | 156 | 27 | 0 | 0.25 |
| rs1027700 | A/T | 375 | 94 | 70 | 26 | 110 | 61 | 14 | **0.012** |
| rs6427630 | A/G | 361 | 165 | 17 | 0 | 154 | 25 | 0 | 0.53 |
| rs2070150 | C/G | 371 | 172 | 18 | 0 | 156 | 25 | 0 | 0.55 |
| rs1135983 | C/T | 375 | 173 | 15 | 1 | 163 | 18 | 5 | **0.002** |
| rs2134690 | G/A | 368 | 144 | 42 | 2 | 131 | 47 | 2 | 0.41 |
| rs10917955 | T/C | 355 | 164 | 17 | 0 | 150 | 24 | 0 | 0.55 |
| rs3738326 | G/A | 353 | 162 | 18 | 0 | 147 | 26 | 0 | 0.45 |
| rs11576878 | A/G | 355 | 91 | 64 | 26 | 103 | 58 | 13 | **0.007** |
| rs4656334 | G/A | 353 | 163 | 17 | 0 | 148 | 25 | 0 | 0.51 |
| rs2134697 | A/G | 365 | 107 | 60 | 21 | 90 | 77 | 10 | 0.35 |
| rs2134696 | T/A | 354 | 141 | 44 | 2 | 123 | 42 | 2 | 0.45 |
| rs4657109 | G/A | 353 | 155 | 25 | 0 | 142 | 31 | 0 | 0.17 |
| rs3817085 | G/C | 379 | 163 | 27 | 0 | 155 | 34 | 0 | 0.13 |
| rs12403862 | A/G | 355 | 164 | 17 | 0 | 150 | 24 | 0 | 0.55 |
| rs4657110 | C/T | 353 | 155 | 25 | 0 | 142 | 31 | 0 | 0.17 |
| rs2340715 | G/T | 374 | 164 | 25 | 0 | 151 | 34 | 0 | 0.14 |
| rs1006310 | C/T | 353 | 82 | 75 | 23 | 65 | 89 | 19 | 0.78 |
| rs1553444 | T/C | 355 | 134 | 45 | 2 | 125 | 46 | 3 | 0.50 |
| rs3767635 | A/G | 372 | 98 | 73 | 17 | 86 | 81 | 17 | 0.98 |
| rs3767633 | A/T | 375 | 134 | 53 | 2 | 133 | 50 | 3 | 0.23 |
| rs1394066 | A/G | 360 | 131 | 44 | 6 | 133 | 45 | 1 | 1 |
| rs3767632 | G/A | 379 | 83 | 85 | 23 | 71 | 87 | 30 | 0.75 |
| rs6427632 | C/T | 355 | 137 | 38 | 6 | 129 | 44 | 1 | 0.94 |
| rs1503815 | C/T | 371 | 143 | 39 | 7 | 135 | 46 | 1 | 0.73 |
| rs12024729 | T/A | 355 | 156 | 25 | 0 | 143 | 31 | 0 | 0.18 |
| rs2340721 | C/A | 360 | 83 | 78 | 21 | 67 | 93 | 18 | 0.39 |
| rs2340722 | A/G | 374 | 156 | 34 | 0 | 151 | 33 | 0 | 0.08 |
| rs4147177 | C/T | 374 | 159 | 27 | 0 | 153 | 35 | 0 | 0.12 |
| rs1806594 | C/T | 353 | 136 | 42 | 2 | 126 | 44 | 3 | 0.69 |
| rs6427635 | T/C | 352 | 147 | 33 | 0 | 141 | 31 | 0 | 0.08 |
| rs12033967 | G/A | 355 | 156 | 25 | 0 | 143 | 31 | 0 | 0.18 |
| rs2341473 | G/A | 371 | 158 | 31 | 0 | 148 | 34 | 0 | 0.08 |
| rs12079579 | G/A | 374 | 157 | 31 | 2 | 154 | 30 | 0 | 0.92 |
| rs2341479 | A/C | 353 | 124 | 52 | 4 | 120 | 50 | 3 | 0.46 |
| rs4417044 | C/T | 373 | 122 | 62 | 6 | 104 | 73 | 6 | 0.16 |
| rs2341480 | T/G | 350 | 103 | 65 | 9 | 89 | 77 | 7 | 0.13 |
| rs10918215 | A/G | 355 | 104 | 65 | 12 | 84 | 82 | 8 | 0.25 |
| rs7514053 | G/A | 353 | 104 | 64 | 12 | 84 | 81 | 8 | 0.29 |
| rs2341481 | A/G | 377 | 112 | 66 | 12 | 92 | 85 | 10 | 0.42 |
| rs10737517 | A/G | 352 | 103 | 67 | 9 | 89 | 77 | 7 | 0.11 |
| rs10800151 | A/G | 373 | 78 | 83 | 29 | 61 | 96 | 26 | 0.90 |
| rs10918279 | C/A | 371 | 116 | 63 | 10 | 95 | 78 | 9 | 0.54 |
| rs2341471 | G/A | 353 | 74 | 78 | 28 | 59 | 91 | 23 | 0.89 |
| rs13401 | A/G | 379 | 112 | 65 | 13 | 92 | 84 | 13 | 0.90 |
| rs1136046 | G/A | 374 | 156 | 32 | 1 | 143 | 41 | 1 | 0.41 |
| rs2499855 | T/C | 374 | 145 | 43 | 2 | 133 | 47 | 4 | 0.90 |
| rs11579627 | G/A | 371 | 89 | 75 | 26 | 112 | 62 | 10 | 0.08 |
| rs2499849 | C/G | 369 | 114 | 64 | 10 | 84 | 88 | 9 | 0.17 |
| rs9783050 | A/G | 373 | 75 | 87 | 28 | 59 | 95 | 29 | 0.80 |
| rs2490438 | G/A | 367 | 73 | 85 | 28 | 88 | 72 | 21 | 0.31 |
| rs2490433 | C/A | 377 | 70 | 84 | 36 | 85 | 77 | 25 | 0.10 |
| rs2490431 | C/T | 377 | 89 | 85 | 16 | 78 | 92 | 17 | 0.17 |

Table 4S gives the raw counts in the Utah Caucasian sample for all variants typed in the full case control set. Alleles are listed as Major/Minor. Counts are provided for Major homozygotes (D/D), heterozygotes (D/d), and minor homozygotes (d/d), for both controls and cases. Total numbers vary due to dropouts for some markers, and because markers typed only by the International Type 2 Diabetes Chromosome 1q Consortium were based on only 165 control samples. P values for exact tests for deviations from Hardy Weinberg equilibrium are shown in the right column.

**Table 5S: Haplotype Associations for Utah Caucasian Sample**

| **Haplotype** | **Frequency** | **Case/Control** | **ChiSq** | **p value** |
| --- | --- | --- | --- | --- |
| Haplotype Associations |  |  |  |  |
| **Block 1 (-8150, -6402, -6250)** | | | | |
| GGG | 0.549 | 0.513, 0.582 | 3.662 | 0.0557 |
| ATC | 0.396 | 0.431, 0.362 | 3.707 | 0.0542 |
| GTC | 0.053 | 0.051, 0.055 | 0.075 | 0.7841 |
| **Block 2 (5,124 – 25,126)** | | | | |
| GTTGTTCCTAACCCAGCCTAGGT | 0.262 | 0.294, 0.230 | 3.717 | 0.0538 |
| GTTGTTCTTTACCCAGTCTAGGT | 0.197 | 0.177, 0.216 | 1.768 | 0.1837 |
| GTGGTTCTTTACCCAGTCTAGGT | 0.159 | 0.155, 0.164 | 0.12 | 0.7291 |
| GTTATTCTTTACCCAGTCCAGGT | 0.131 | 0.133, 0.130 | 0.007 | 0.931 |
| ATTATTCTTTACCTAGTCCTGGT | 0.13 | 0.120, 0.142 | 0.789 | 0.3744 |
| GCGACCTTCTGGTCGATTTAACC | 0.056 | 0.044, 0.066 | 1.631 | 0.2016 |
| GCTATCCTTTACCCAGTCTAACT | 0.02 | 0.022, 0.017 | 0.212 | 0.6455 |
| **Block 3 (29,845 – 136,621)** | | | | |
| GCGTGAATGGTCAGCAGGGAG | 0.292 | 0.277, 0.305 | 0.679 | 0.4098 |
| GCGTAAACGGTCAGCAGGGAG | 0.274 | 0.305, 0.244 | 3.259 | 0.071 |
| GCATAAGCAATAAGCAGGAAG | 0.079 | 0.080, 0.078 | 0.011 | 0.9177 |
| GCACATACGGTAGGTAGGGCA | 0.077 | 0.072, 0.083 | 0.294 | 0.5874 |
| GCGTAAATGGTCAGCAGGGAG | 0.065 | 0.050, 0.081 | 2.629 | 0.1049 |
| AAATAAACGGAAAACGAAGAA | 0.056 | 0.044, 0.064 | 1.379 | 0.2403 |
| GCACATACGGTAAGTAGGGCA | 0.047 | 0.042, 0.054 | 0.541 | 0.4619 |
| GCATAAGCAATAAGCAGGGAG | 0.047 | 0.045, 0.049 | 0.076 | 0.7831 |
| AAATAAACGGAAAACGAAGCA | 0.021 | 0.025, 0.017 | 0.482 | 0.4876 |
| **Block 4 (144,332 - 199,870)** | | | | |
| TTCAACCAACACCC | 0.378 | 0.364, 0.393 | 0.636 | 0.4252 |
| TTCAATCGACATCT | 0.252 | 0.293, 0.210 | 6.424 | **0.0113** |
| GCTGGTAGGCGCGT | 0.13 | 0.125, 0.136 | 0.184 | 0.6681 |
| GCTGGTAGGTACGT | 0.094 | 0.076, 0.110 | 2.539 | 0.1111 |
| TTCAATCGACACCT | 0.068 | 0.059, 0.078 | 1.028 | 0.3106 |
| TCTGATCGGCACGT | 0.019 | 0.022, 0.017 | 0.226 | 0.6346 |
| GCTGGTAGGTATCT | 0.011 | 0.019, 0.002 | 4.565 | **0.0326** |
| TTCAATCGACACGT | 0.01 | 0.006, 0.015 | 1.358 | 0.244 |
| **Block 5 (200,638 – 205,069)** | | | | |
| AAG | 0.348 | 0.386, 0.311 | 4.612 | **0.0317** |
| GCA | 0.321 | 0.308, 0.333 | 0.557 | 0.4556 |
| GCG | 0.3 | 0.282, 0.317 | 1.138 | 0.2861 |
| GAG | 0.029 | 0.025, 0.033 | 0.444 | 0.5051 |

**Table 6S:** **International Type 2 Diabetes Chromosome 1q Consortium: Meta-Analysis of *ATF6* Region for 44 SNPs**

| rs Number | Chrom. 1 position | Alleles | OR, Meta-analysis of all Consortium samples | | P value, All Consortium Samples | | OR, Meta-analysis of European Samples without Utah data | | P value, European Sample | |
| --- | --- | --- | --- | --- | --- | --- | --- | --- | --- | --- |
| Allele 1 | Allele 2 | Allele 1 | Allele 2 | Allele 1 | Allele 2 | Allele 1 | Allele 2 |
| rs2271010 | 158468131 | T/C | 0.92 (0.77 - 1.1) | 1.05 (0.76 - 1.44) | 0.36 | 0.77 | 0.83 (0.65 - 1.05) | 1.12 (0.59 - 2.13) | 0.12 | 0.72 |
| rs905594 | 158472932 | T/C | 0.89 (0.74 - 1.08) | 0.89 (0.76 - 1.05) | 0.24 | 0.16 | 1.02 (0.77 - 1.35) | 0.9 (0.75 - 1.08) | 0.87 | 0.25 |
| rs2340824 | 158478430 | T/C | 0.88 (0.74 - 1.06) | 0.89 (0.76 - 1.05) | 0.17 | 0.66 | 0.81 (0.64 - 1.03) | 1.12 (0.59 - 2.12) | 0.09 | 0.73 |
| rs2070151 | 158479714 | T/C | 1.01 (0.72 - 1.42) | 0.96 (0.8 - 1.15) | 0.94 | 0.65 | 1.02 (0.5 - 2.09) | 0.91 (0.7 - 1.17) | 0.95 | 0.44 |
| rs2271013 | 158485460 | A/G | 0.99 (0.67 - 1.45) | 0.95 (0.78 - 1.17) | 0.95 | 0.64 | 0.49 (0.09 - 2.69) | 0.92 (0.69 - 1.21) | 0.4 | 0.54 |
| rs1027700 | 158488694 | A/T | 1.14 (0.98 - 1.32) | 0.84 (0.65 - 1.08) | 0.1 | 0.17 | 1.14 (0.95 - 1.37) | 0.9 (0.67 - 1.21) | 0.17 | 0.49 |
| rs6427630 | 158489285 | A/G | 1.1 (0.81 - 1.49) | 0.93 (0.78 - 1.13) | 0.53 | 0.48 | 1.15 (0.69 - 1.93) | 0.92 (0.71 - 1.19) | 0.59 | 0.52 |
| rs2070150 | 158492934 | G/C | 1.06 (0.77 - 1.46) | 0.89 (0.74 - 1.09) | 0.7 | 0.26 | 1.04 (0.6 - 1.8) | 0.89 (0.69 - 1.15) | 0.89 | 0.38 |
| rs10917955 | 158497653 | A/G | 1.01 (0.69 - 1.48) | 0.92 (0.75 - 1.13) | 0.96 | 0.43 | 0.59 (0.14 - 2.46) | 0.93 (0.7 - 1.23) | 0.46 | 0.6 |
| rs3738326 | 158503900 | A/G | 0.97 (0.8 - 1.17) | 1.00 (0.69 - 1.44) | 0.72 | 0.98 | 0.97 (0.74 - 1.28) | 0.71 (0.18 - 2.8) | 0.84 | 0.62 |
| rs11576878 | 158507235 | T/C | 1.14 (0.98 - 1.32) | 0.84 (0.65 - 1.08) | 0.09 | 0.18 | 1.15 (0.96 - 1.38) | 0.89 (0.67 - 1.2) | 0.14 | 0.46 |
| rs4656334 | 158510352 | T/C | 1 (0.7 - 1.44) | 0.94 (0.78 - 1.14) | 0.99 | 0.55 | 0.71 (0.18 - 2.8) | 0.91 (0.69 - 1.2) | 0.62 | 0.51 |
| rs4657109 | 158516063 | A/G | 0.92 (0.77 - 1.11) | 0.96 (0.68 - 1.37) | 0.38 | 0.84 | 0.87 (0.67 - 1.13) | 0.79 (0.26 - 2.43) | 0.31 | 0.68 |
| rs3817085 | 158521283 | G/C | 1.08 (0.9 - 1.3) | 0.96 (0.68 - 1.35) | 0.41 | 0.82 | 0.93 (0.72 - 1.2) | 0.66 (0.26 - 1.68) | 0.57 | 0.38 |
| rs12403862 | 158529006 | T/C | 0.89 (0.74 - 1.09) | 1.07 (0.78 - 1.46) | 0.26 | 0.67 | 0.9 (0.69 - 1.16) | 1.09 (0.65 - 1.84) | 0.41 | 0.73 |
| rs4657110 | 158529897 | A/G | 0.9 (0.75 - 1.07) | 1.04 (0.77 - 1.4) | 0.24 | 0.81 | 0.84 (0.66 - 1.07) | 1.1 (0.65 - 1.85) | 0.15 | 0.72 |
| rs2340715 | 158537546 | A/C | 0.9 (0.76 - 1.08) | 1.01 (0.75 - 1.36) | 0.26 | 0.94 | 0.85 (0.67 - 1.08) | 1.09 (0.67 - 1.79) | 0.18 | 0.73 |
| rs1006310 | 158543213 | A/G | 0.9 (0.77 - 1.06) | 0.91 (0.75 - 1.1) | 0.21 | 0.32 | 0.92 (0.76 - 1.11) | 1.01 (0.75 - 1.35) | 0.38 | 0.97 |
| rs1553444 | 158545173 | T/C | 0.97 (0.82 - 1.15) | 1.44 (0.83 - 2.49) | 0.72 | 0.19 | 1 (0.81 - 1.23) | 1.04 (0.56 - 1.94) | 0.98 | 0.89 |
| rs3767635 | 158552562 | A/G | 0.83 (0.62 - 1.12) | 0.87 (0.75 - 1.02) | 0.23 | 0.09 | 0.8 (0.58 - 1.11) | 0.88 (0.73 - 1.06) | 0.18 | 0.16 |
| rs3767633 | 158558273 | A/T | 1.42 (0.77 - 2.62) | 1.00 (0.84 - 1.19) | 0.26 | 0.97 | 1.05 (0.53 - 2.1) | 0.98 (0.79 - 1.22) | 0.89 | 0.86 |
| rs1394066 | 158562586 | A/G | 0.84 (0.6 - 1.18) | 1.13 (0.95 - 1.35) | 0.32 | 0.18 | 1.38 (0.63 - 3.01) | 1.07 (0.84 - 1.35) | 0.42 | 0.59 |
| rs6427632 | 158566439 | A/G | 1.07 (0.9 - 1.28) | 0.83 (0.59 - 1.16) | 0.43 | 0.27 | 1.04 (0.82 - 1.3) | 1.33 (0.63 - 2.82) | 0.76 | 0.46 |
| rs1503815 | 158569786 | A/G | 1.1 (0.92 - 1.32) | 0.79 (0.56 - 1.11) | 0.27 | 0.18 | 1.07 (0.85 - 1.35) | 1.3 (0.59 - 2.86) | 0.57 | 0.52 |
| rs12024729 | 158579028 | T/A | 0.92 (0.76 - 1.1) | 1.02 (0.72 - 1.44) | 0.34 | 0.91 | 0.87 (0.67 - 1.13) | 0.81 (0.29 - 2.3) | 0.29 | 0.69 |
| rs2340721 | 158581043 | T/G | 0.93 (0.77 - 1.12) | 0.88 (0.75 - 1.03) | 0.44 | 0.11 | 1 (0.76 - 1.31) | 0.88 (0.74 - 1.06) | 1 | 0.19 |
| rs2340722 | 158588082 | T/C | 0.99 (0.81 - 1.21) | 1.45 (0.71 - 2.97) | 0.92 | 0.31 | 0.98 (0.78 - 1.24) | 1.12 (0.52 - 2.4) | 0.89 | 0.77 |
| rs1806594 | 158590518 | T/C | 1.67 (0.91 - 3.08) | 0.94 (0.79 - 1.11) | 0.1 | 0.46 | 1.23 (0.62 - 2.47) | 0.97 (0.78 - 1.21) | 0.55 | 0.81 |
| rs6427635 | 158595581 | A/G | 1.01 (0.71 - 1.43) | 0.94 (0.78 - 1.12) | 0.98 | 0.48 | 0.81 (0.29 - 2.31) | 0.88 (0.68 - 1.14) | 0.7 | 0.34 |
| rs12033967 | 158603465 | A/G | 0.91 (0.76 - 1.09) | 1.01 (0.71 - 1.42) | 0.29 | 0.97 | 0.86 (0.66 - 1.11) | 0.82 (0.31 - 2.18) | 0.24 | 0.69 |
| rs2341473 | 158604429 | A/G | 0.97 (0.8 - 1.18) | 0.99 (0.68 - 1.43) | 0.78 | 0.94 | 0.92 (0.7 - 1.2) | 0.7 (0.24 - 2.08) | 0.52 | 0.52 |
| rs12079579 | 158612140 | A/G | 1.05 (0.87 - 1.26) | 1.28 (0.68 - 2.42) | 0.64 | 0.44 | 0.88 (0.68 - 1.15) | 4.12 (0.87 - 19.5) | 0.34 | 0.05 |
| rs4534354 | 158617010 | A/C | 1.58 (0.94 - 2.67) | 0.98 (0.83 - 1.15) | 0.08 | 0.81 | 1.71 (0.91 - 3.21) | 0.97 (0.79 - 1.19) | 0.09 | 0.76 |
| rs4417044 | 158620613 | A/G | 0.92 (0.79 - 1.06) | 1.10 (0.86 - 1.41) | 0.25 | 0.43 | 0.93 (0.77 - 1.12) | 1.08 (0.75 - 1.57) | 0.43 | 0.67 |
| rs4265410 | 158627596 | T/G | 0.97 (0.83 - 1.12) | 0.98 (0.79 - 1.23) | 0.66 | 0.89 | 0.98 (0.81 - 1.18) | 0.8 (0.54 - 1.19) | 0.82 | 0.28 |
| rs10918215 | 158631389 | T/C | 0.96 (0.83 - 1.12) | 1.04 (0.84 - 1.29) | 0.61 | 0.73 | 0.98 (0.82 - 1.19) | 0.93 (0.64 - 1.35) | 0.86 | 0.71 |
| rs7514053 | 158634693 | T/C | 1.01 (0.82 - 1.25) | 0.96 (0.82 - 1.12) | 0.91 | 0.58 | 0.94 (0.64 - 1.36) | 0.98 (0.81 - 1.18) | 0.73 | 0.82 |
| rs10737517 | 158639996 | A/G | 1.03 (0.84 - 1.27) | 0.97 (0.83 - 1.13) | 0.77 | 0.67 | 0.93 (0.67 - 1.29) | 0.97 (0.8 - 1.16) | 0.65 | 0.71 |
| rs10800151 | 158645941 | A/G | 1.13 (0.9 - 1.41) | 0.93 (0.80 - 1.07) | 0.29 | 0.30 | 1.08 (0.83 - 1.42) | 0.88 (0.73 - 1.07) | 0.56 | 0.2 |
| rs10918279 | 158649650 | A/C | 0.97 (0.83 - 1.12) | 0.99 (0.79 - 1.23) | 0.65 | 0.92 | 0.98 (0.82 - 1.19) | 0.77 (0.52 - 1.15) | 0.87 | 0.2 |
| rs2341471 | 158656407 | A/G | 0.95 (0.82 - 1.1) | 1.14 (0.91 - 1.42) | 0.51 | 0.25 | 0.9 (0.74 - 1.09) | 1.11 (0.84 - 1.45) | 0.27 | 0.46 |
| rs2499849 | 158663286 | G/C | 1 (0.82 - 1.23) | 0.91 (0.79 - 1.06) | 0.99 | 0.23 | 0.9 (0.66 - 1.23) | 0.99 (0.82 - 1.19) | 0.51 | 0.92 |
| rs2490438 | 158668446 | A/G | 1.1 (0.94 - 1.27) | 0.90 (0.70 - 1.15) | 0.23 | 0.39 | 1.08 (0.9 - 1.31) | 0.87 (0.65 - 1.16) | 0.39 | 0.34 |
| rs2490431 | 158672877 | T/C | 0.9 (0.74 - 1.09) | 0.94 (0.80 - 1.10) | 0.27 | 0.44 | 0.93 (0.7 - 1.23) | 0.95 (0.79 - 1.14) | 0.59 | 0.58 |

| **Rs number** | **Location** | **Build 35 Location** | **allele** | **Control** | | | **Case** | | | **Minor Allele Frequency** | | **P value** |
| --- | --- | --- | --- | --- | --- | --- | --- | --- | --- | --- | --- | --- |
|  |  |  |  | **D/D** | **D/d** | **d/d** | **D/D** | **D/d** | **d/d** | Control | Case |  |
| rs1417581 | -6,250 | 158,461,559 | C/G | 126 | 50 | 7 | 258 | 106 | 5 | 0.171 | 0.134 | 0.45 |
| rs905594 | 5,124 | 158,472,932 | A/G | 125 | 55 | 4 | 276 | 84 | 7 | 0.060 | 0.047 | 0.09 |
| rs1058405 | 15,591 | 158,483,399 | T/C | 161 | 22 | 0 | 335 | 33 | 1 | 0.057 | 0.056 | 0.22 |
| rs2070150 | 25,126 | 158,492,934 | C/G | 165 | 19 | 1 | 327 | 39 | 1 | 0.124 | 0.149 | 0.95 |
| rs1135983 | 26,162 | 158,492,970 | C/T | 144 | 36 | 5 | 267 | 94 | 8 | 0.381 | 0.373 | 0.26 |
| rs1136046 | 192,621 | 158,660,429 | C/T | 73 | 83 | 29 | 152 | 159 | 58 | 0.060 | 0.046 | 0.78 |
| rs11579627 | 194,804 | 158,662,612 | C/T | 162 | 22 | 0 | 335 | 32 | 1 | 0.060 | 0.046 | 0.33 |

**Table 7S: Arkansas African American Case Control Data**

SNPs typed in full African American sample from Arkansas are provided with locations, major/minor alleles, and genotype counts in controls and cases. Minor allele frequencies are given in controls and cases, and the p value based on allelic association.

**Table 8S: Marginal Means for Utah Caucasian Study of Glucose Homeostasis Traits**

| **SNP** | **Trait** | **Mean 1** | **Mean 2** | **Mean 3** | **p value** |
| --- | --- | --- | --- | --- | --- |
| rs1058405 | N | 62 | 56 | 6 |  |
| (M67V) | SI | 6.86 (5.22,9.01) | 5.37 (4.20,6.86) | * | 0.14 |
|  | AIRg | 144 (117,179) | 177 (146,214) | * | 0.12 |
|  | DI | 98 (61,159) | 135 (87,209) | * | 0.28 |
| rs2070150 | N | 106 | 15 | 0 |  |
| (P145A) | SI | 5.76 (4.71,7.06) | 5.73 (3.53,9.32) | --- | 0.98 |
|  | AIRg | 170 (144,202) | 134 (90,200) | --- | 0.25 |
|  | DI | 116 (82,163) | 101 (44,230) | --- | 0.75 |
| rs1135983 | N | 102 | 16 | 1 |  |
| (S157P) | SI | 5.62 (4.62,6.83) | 8.66 (5.50,13.64) | * | 0.066 |
|  | AIRg | 171 (145,202) | 126 (86,185) | * | 0.12 |
|  | DI | 113 (79,160) | 96 (42,216) | * | 0.7 |
| rs11579627 | N | 66 | 49 | 6 |  |
|  | SI | 6.87 (5.31,8.89) | 5.63 (4.36,7.27) | * | 0.24 |
|  | AIRg | 154 (125,190) | 181 (147,222) | * | 0.25 |
|  | DI | 97 (61,153) | 136 (86,215) | * | 0.26 |

Marginal means adjusted for body mass index, age, gender, diagnosis (normal or IGT) and family history are shown for each SNP; N, number of individuals with each genotype; SI, insulin sensitivity index from intravenous glucose tolerance test; AIRg, acute insulin response to glucose from 0 to 10 min as area under insulin curve over baseline; DI, disposition index (AIRg*SI). --- no genotypes detected; * analyzed under carrier status (heterozygotes and rare homozygotes combined).

**Table 9S: Marginal Means for Arkansas Caucasian Study of Glucose Homeostasis Traits**

| SNP | Trait | Mean 1 | Mean 2 | Mean 3 | p value |
| --- | --- | --- | --- | --- | --- |
| rs1058405 | N | 112 | 83 | 11 |  |
| (M67V) | SI | 2.99 (2.51,3.58) | 3.30 (2.69,4.05) | 2.39 (1.34,4.22) | 0.52 |
|  | AIRg | 389 (3420,445) | 356 (305,416) | 296 (192,456) | 0.39 |
|  | DI | 1166 (967,1406) | 1173 (945,1457) | 706 (387, 1288) | 0.27 |
| rs2070150 | N | 178 | 25 | --- |  |
| (P145A) | SI | 2.96 (2.57,3.42) | 3.78 (2.62,5.45) | --- | 0.22 |
|  | AIRg | 374 (335,416) | 371 (281,490) | --- | 0.96 |
|  | DI | 1108 (952,1289) | 1402 (951,2066) | | 0.26 |
| rs1135983 | N | 181 | 22 | 2 |  |
| (S157P) | SI | 3.21 (2.78,3.70) | 2.4 (1.65,3.49) | * | 0.16 |
|  | AIRg | 367 (330,409) | 372 (280,494) | * | 0.93 |
|  | DI | 178 (1013,1370) | 894 (602,1329) | * | 0.2 |
| rs11579627 | N | 118 | 76 | 13 |  |
| rs1058405 | SI | 3.00 (2.52,3.56) | 3.29 (2.66,4.07) | 2.58 (1.54,4.34) | 0.63 |
|  | AIRg | 379 (332,432) | 373 (318,439) | 307 (207,455) | 0.60 |
|  | DI | 1135 (947,1361) | 1227 (980,1536) | 791 (458,1368) | 0.34 |

Marginal means adjusted for body mass index, age, gender, and protocol are shown for each SNP; N, number of individuals with each genotype; SI, insulin sensitivity index from intravenous glucose tolerance test; AIRg, acute insulin response to glucose from 0 to 10 min as area under insulin curve over baseline; DI, disposition index (AIRg*SI). --- no genotypes detected; * analyzed under carrier status (heterozygotes and rare homozygotes combined).

**Figure 3S: Linkage disequilibrium in Caucasian sample for 64 markers: D’ Plot**


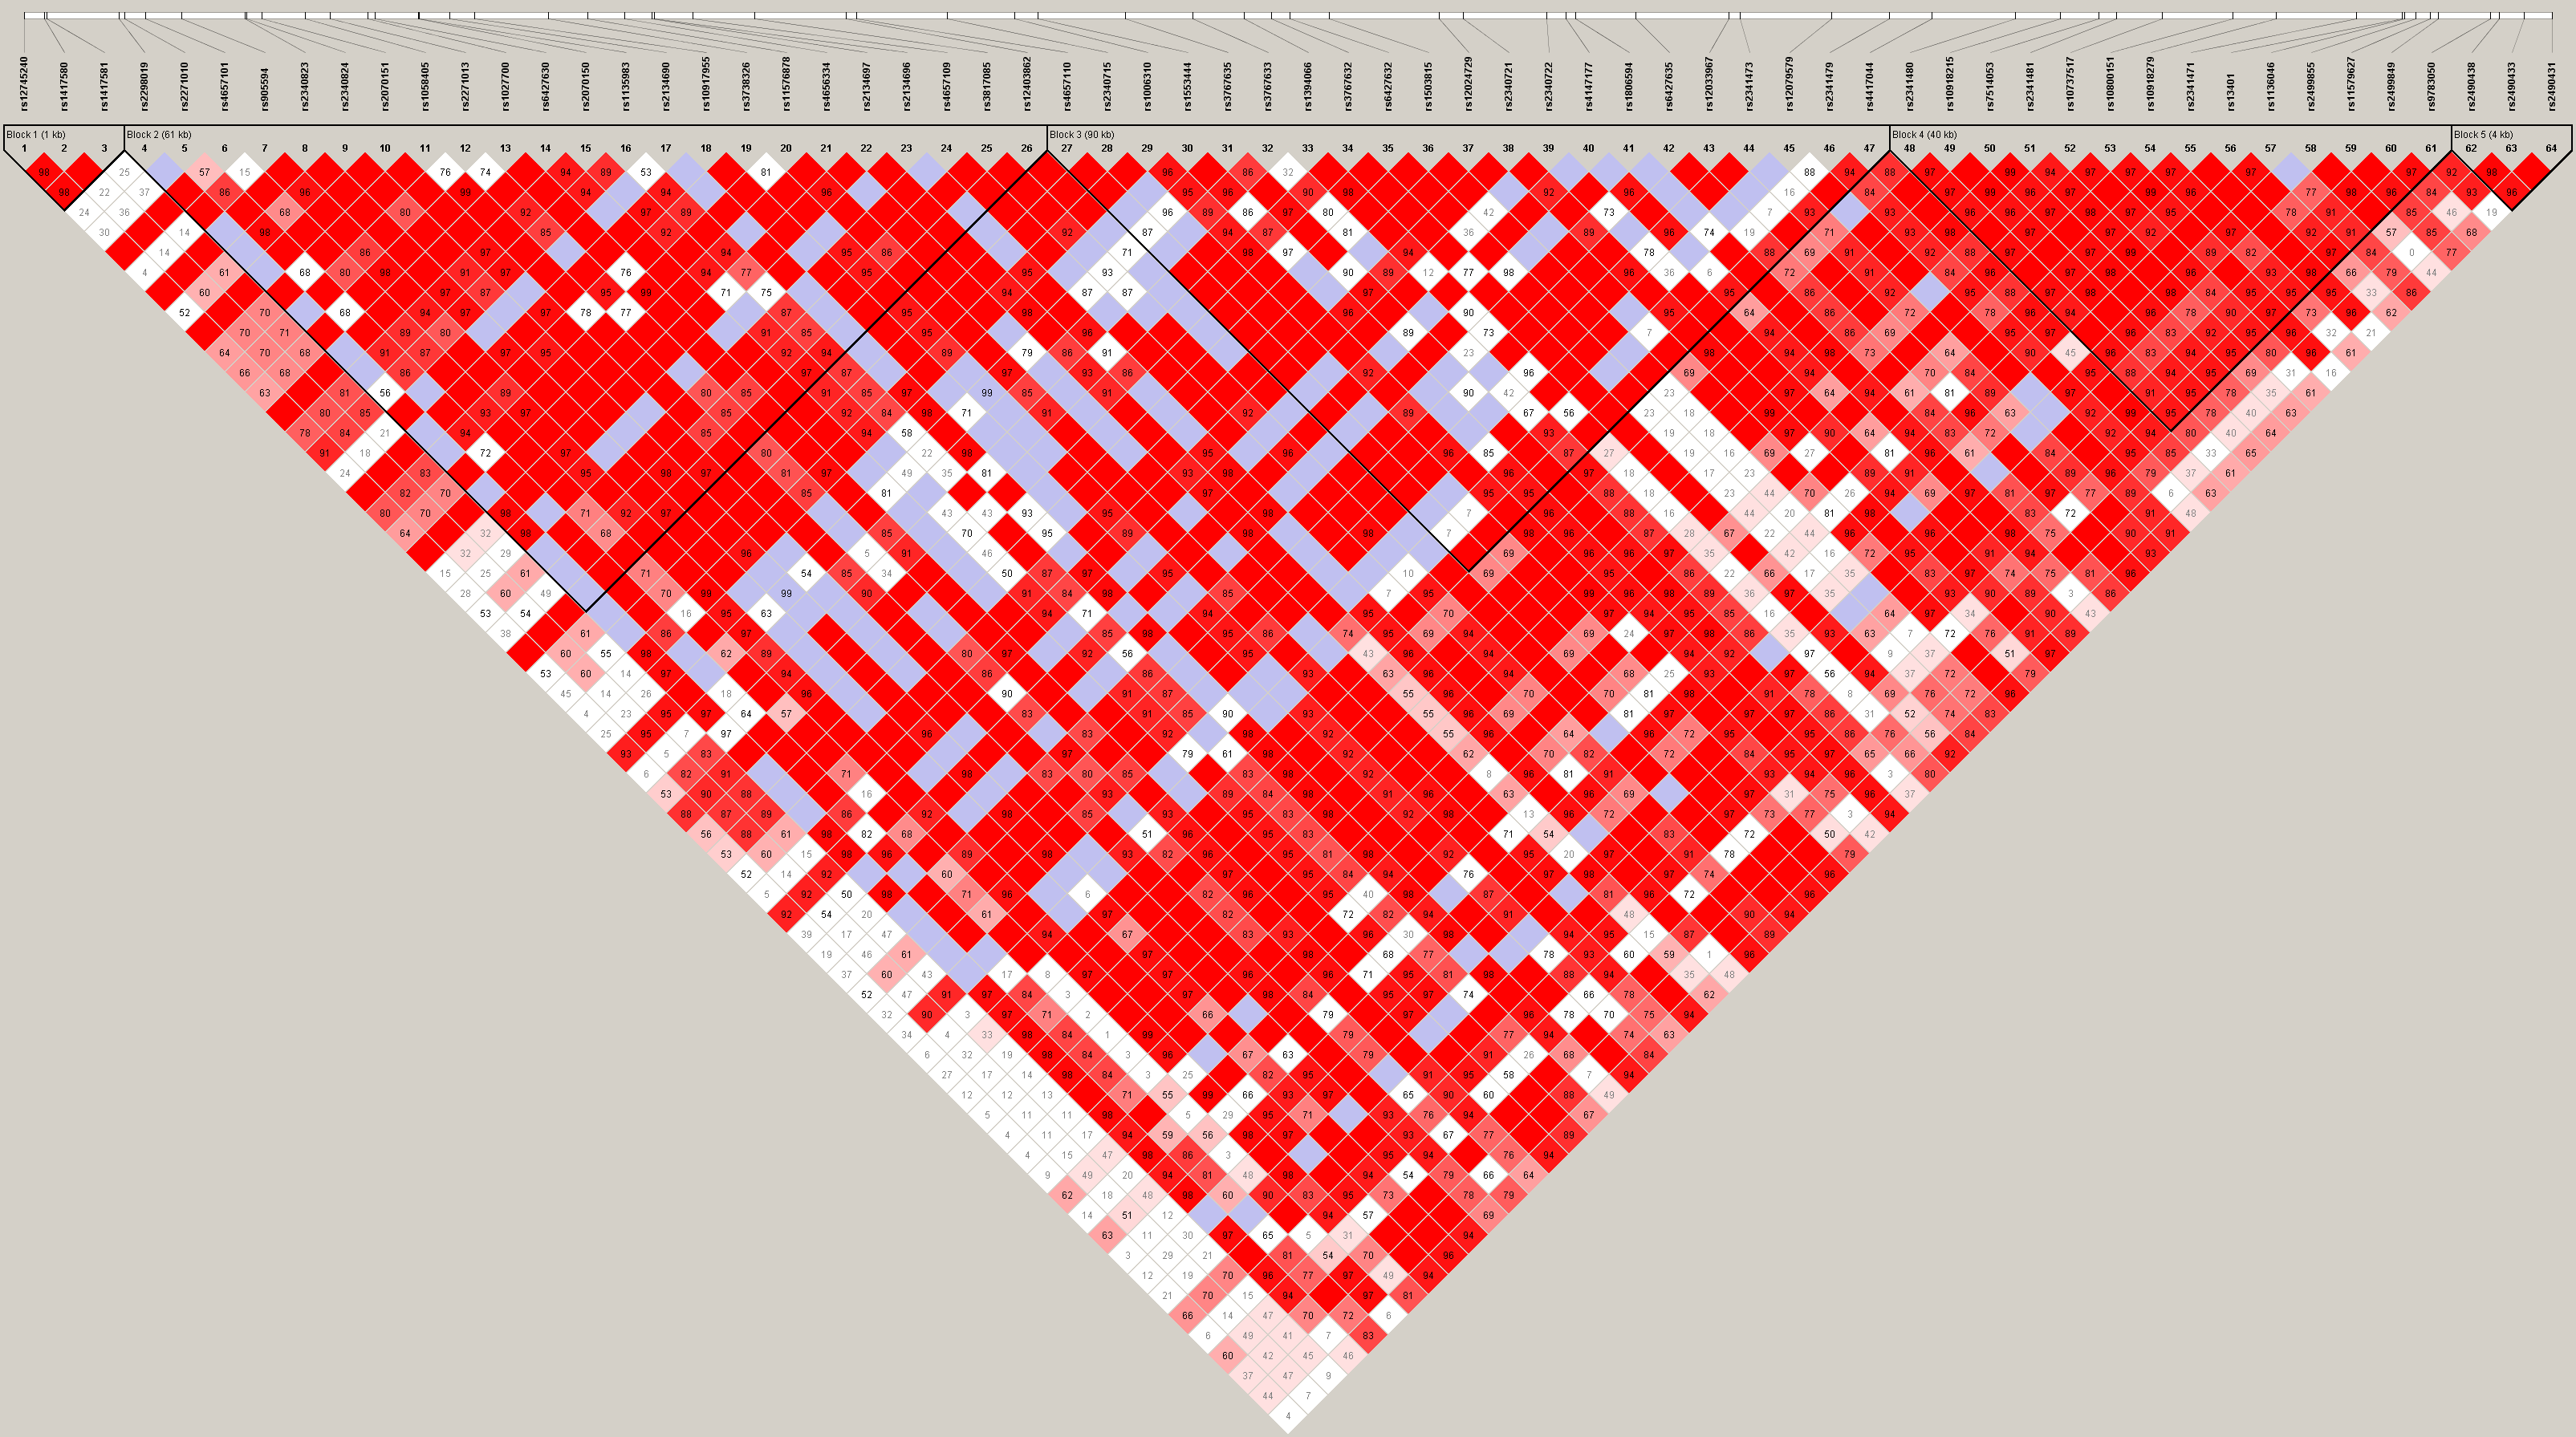


Linkage disequilibrium and haplotype blocks are shown for 64 markers extending from 8 kb upstream to downstream of the ATF6 gene. Solid red squares represent D’=1; blue squares represent rare SNPs with D’=1 but inadequate data for significance. Numbers represent D’ expressed as a percentage. Haplotype blocks based on solid spline of D’ are shown as triangles.


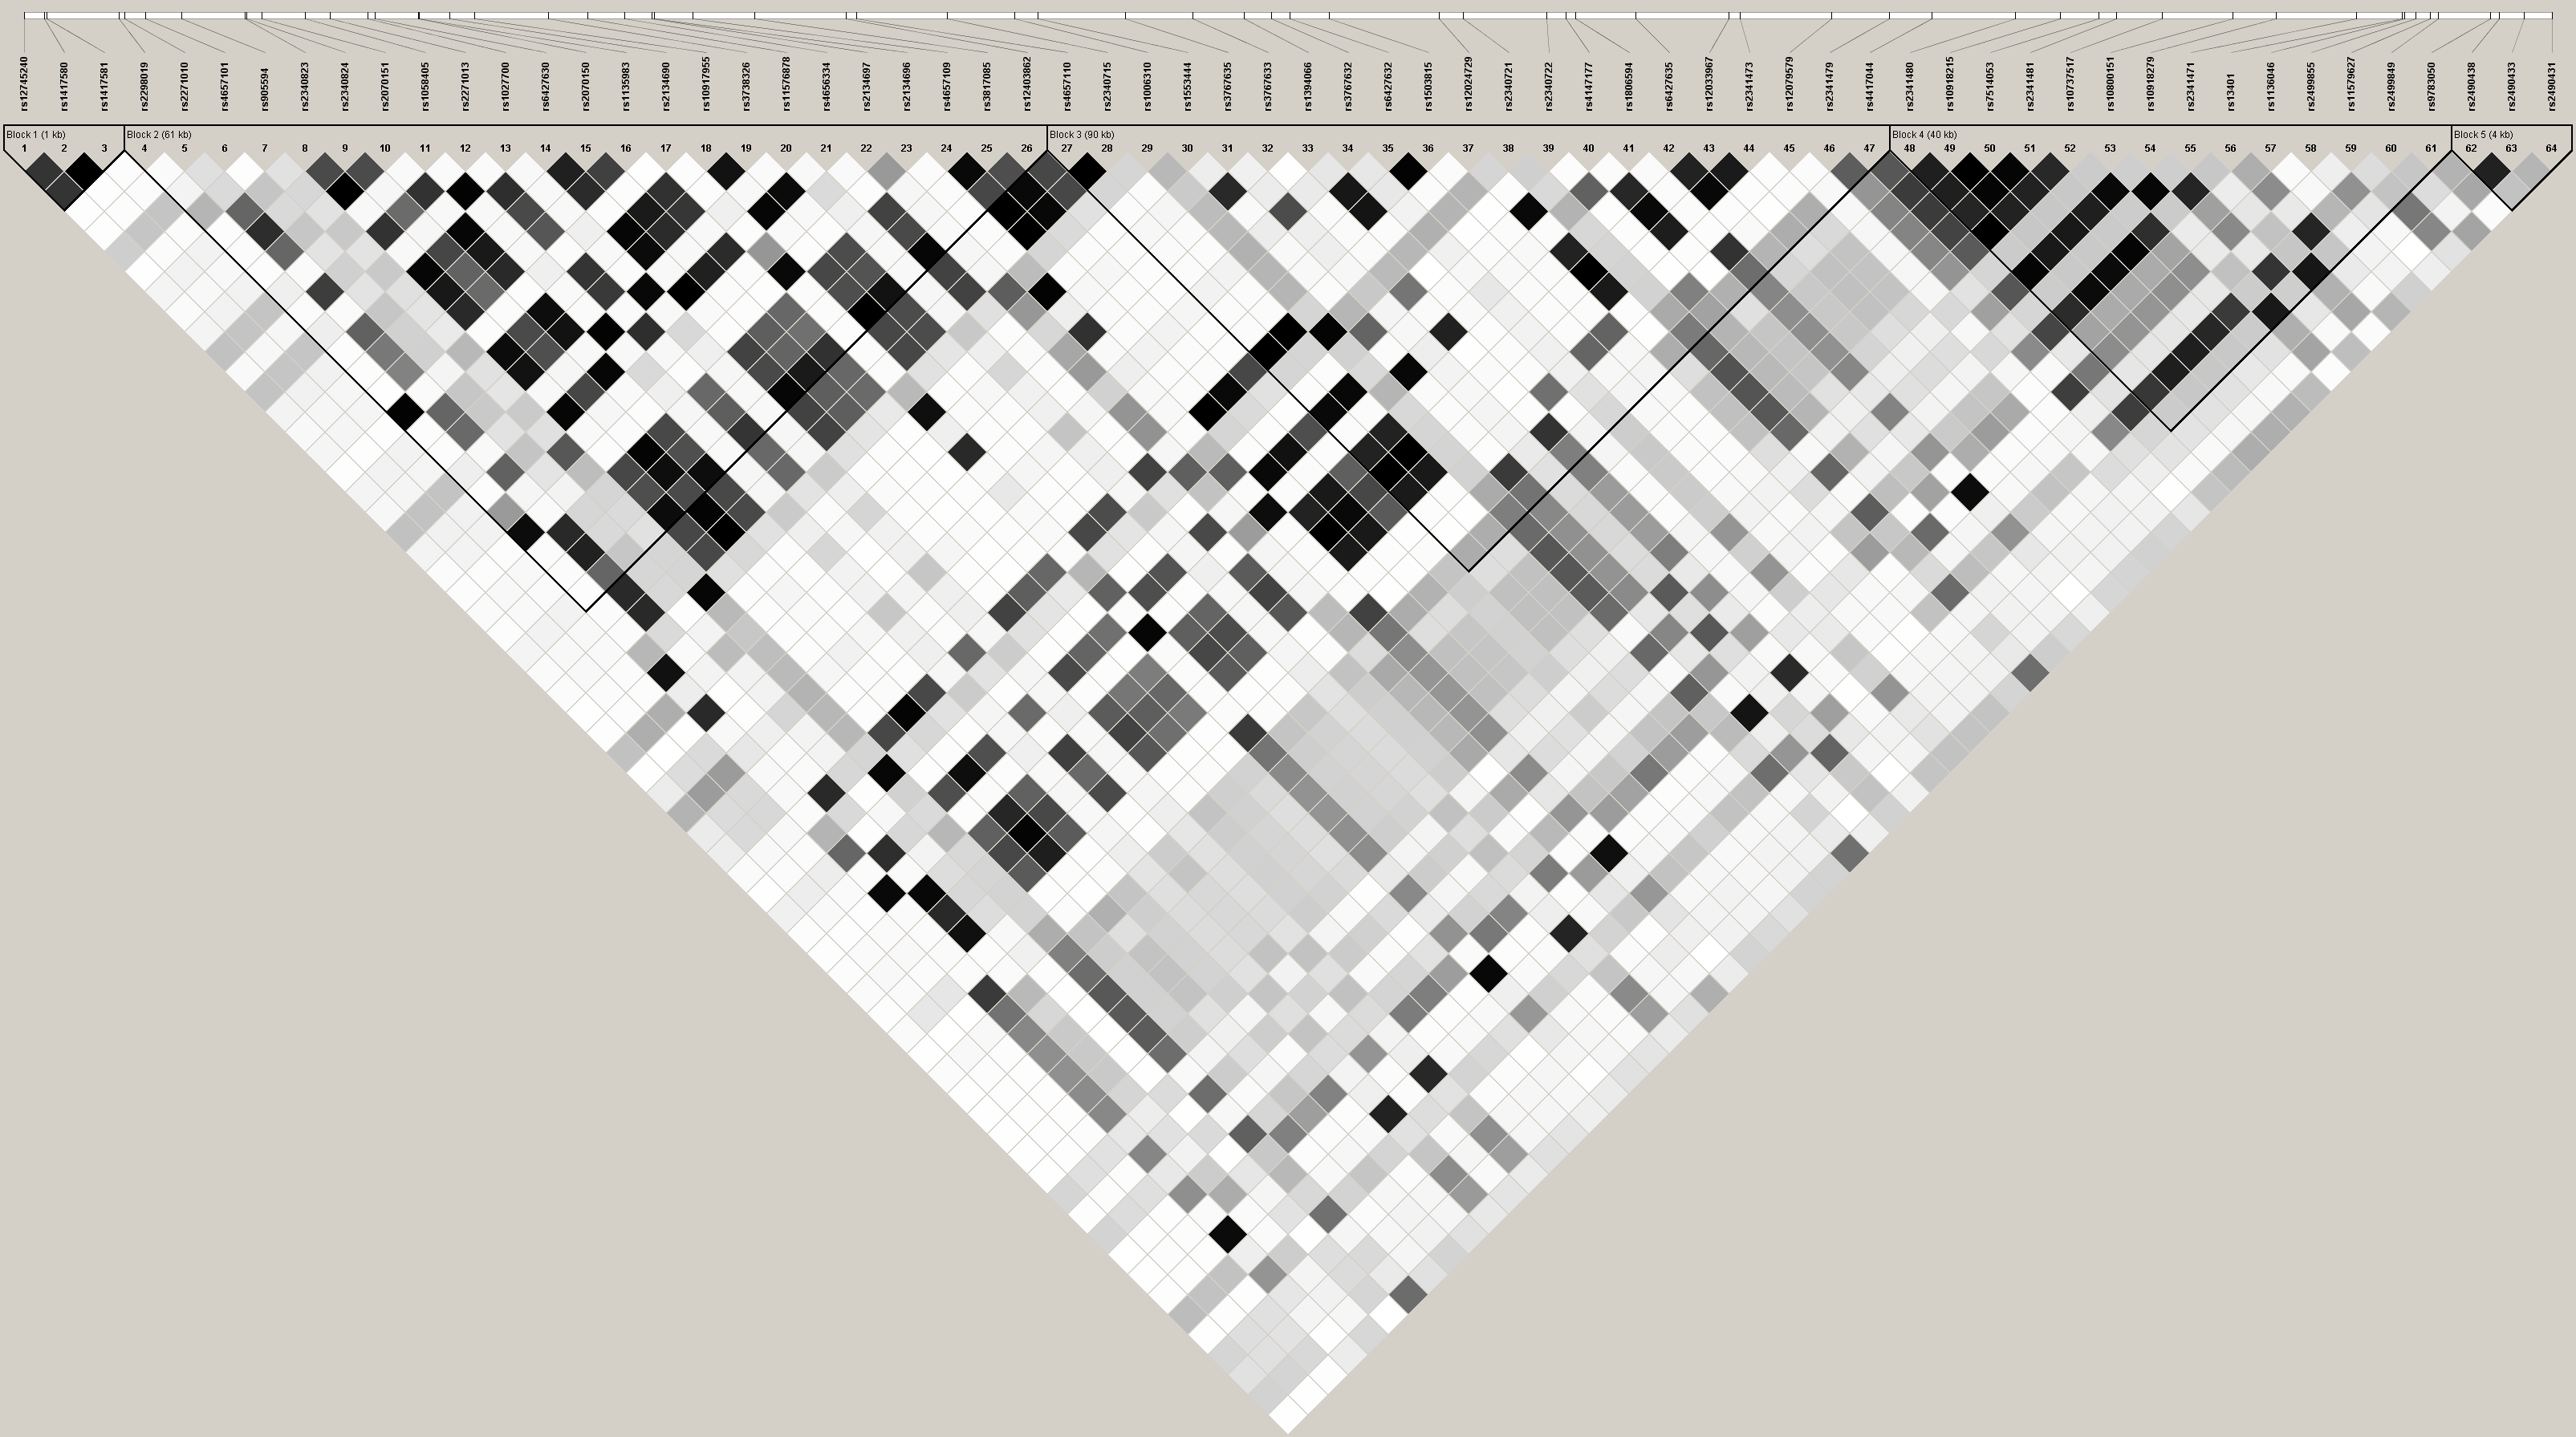
**Figure 4S: Linkage disequilibrium in Caucasian sample for 64 markers:r2 Plot**

Linkage disequilibrium and haplotype blocks are shown for 64 markers extending from 8 kb upstream to downstream of the ATF6 gene. Solid black squares represent r2=1; white squares represent r2=0, and grey squares are intermediate. Haplotype blocks based on solid spline of D’ are shown as triangles.
